# Supplementary material for: The Causes and Role of Antinatalism in Poland in the Context of Climate Change, Obstetric Care, and Mental Health
Source: MDPI journal article supplement (doi:10.3390/ijerph192013575), 2022-10-20
Supplement: s1 [file s1]

**Table S1.** Criteria for group assignment.

| <b>Group assignment</b>    |                               |                  |
|----------------------------|-------------------------------|------------------|
| Group number               | Willingness to have offspring | Having offspring |
| <b>1</b><br>n=55 (4.45%)   | +                             | +                |
| <b>2</b><br>n=637 (51.38%) | +                             | -                |
| <b>3</b><br>n=76 (6.14%)   | -                             | +                |
| <b>4</b><br>n=472 (38.07%) | -                             | -                |

Legend: + presence of certain attitude; - lack of certain attitude
